# Supplementary material for: Bladder sparing management for muscle-invasive bladder cancer after a complete clinical response: ready for prime time?—a narrative review
Source: PubMed Central journal article supplement — Transl Cancer Res. 2024 Nov 11;13(11):6413–29. doi: 10.21037/tcr-24-726 (PMC11651806; doi:10.21037/tcr-24-726), 2024-11-11
Supplement: tcr-13-11-6413-rc.pdf [file tcr-13-11-6413-rc.pdf]

## Narrative Review Checklist

| Section/Topic             | Item No | Item                                                                                                                                                                               | Reported on Page Number/Line Number        | Reported on Section/Paragraph                                                        |
|---------------------------|---------|------------------------------------------------------------------------------------------------------------------------------------------------------------------------------------|--------------------------------------------|--------------------------------------------------------------------------------------|
| <b>TITLE</b>              |         |                                                                                                                                                                                    |                                            |                                                                                      |
| Title                     | 1       | Identify the report as a Narrative Review or Literature Review.                                                                                                                    | 1/1-2                                      | Title                                                                                |
| <b>ABSTRACT</b>           |         |                                                                                                                                                                                    |                                            |                                                                                      |
| Structured summary        | 2       | Provide a structured summary with the subsections as: Background and Objective, Methods, Key Content and Findings, Conclusions.                                                    | 2/36-59                                    | Abstract                                                                             |
| <b>INTRODUCTION</b>       |         |                                                                                                                                                                                    |                                            |                                                                                      |
| Rationale/background      | 3       | Describe the rationale for the review in the context of what is already known.                                                                                                     | 3/60-83                                    | Introduction/1-3                                                                     |
| Objectives                | 4       | Specify the key question(s) identified for the review topic.                                                                                                                       | 3/84-87                                    | Introduction/4                                                                       |
| <b>METHODS</b>            |         |                                                                                                                                                                                    |                                            |                                                                                      |
| Research selection        | 5       | Specify the process for identifying the literature search (eg, years considered, language, publication status, study design, and databases of coverage).                           | 4/88-94                                    | Methods                                                                              |
| <b>DISCUSSION/SUMMARY</b> |         |                                                                                                                                                                                    |                                            |                                                                                      |
| Narrative                 | 6       | Discuss: 1) research reviewed including fundamental or key findings, 2) limitations and/or quality of research reviewed, and 3) need for future research.                          | 5/95-12/451<br>13/452-471<br>13/472-14/483 | Results (Section 3)<br>Limitations (Section 4)<br>Future Direction (Section 4.1)     |
| Summary                   | 7       | Provide an overall interpretation of the narrative review in the context of clinical practice for health professionals, policy development and implementation, or future research. | 13/452 – 14/493                            | Limitations (Section 4)<br>Future Directions (section 4.1)<br>Conclusion (Section 5) |

Article information: <https://dx.doi.org/10.21037/tcr-24-726>

\*As the checklist was provided upon initial submission, the page number/line number reported may be changed due to copyediting and may not be referable in the published version. In this case, the section/paragraph may be used as an alternative reference.
